# Supplementary material for: Effects of Sphingomyelin-Containing Milk Phospholipids on Skin Hydration in UVB-Exposed Hairless Mice
Source: MDPI journal article supplement (doi:10.3390/molecules27082545), 2022-04-14
Supplement: s1 [file s1]

## Supplementary Materials

# Effects of Sphingomyelin-Containing Milk Phospholipids on Skin Hydration in UVB-Exposed Hairless Mice

Yejin Ahn <sup>1</sup>, Min Guk Kim <sup>1</sup>, Kyungae Jo <sup>1</sup>, Ki-Bae Hong <sup>2,\*</sup> and Hyung Joo Suh <sup>1,3,\*</sup>

<sup>1</sup> Department of Integrated Biomedical and Life Science, Graduate School, Korea University, Seoul 02841, Korea; ahnyj708@gmail.com (Y.A.); minguk94@gmail.com (M.G.K.); kyungae11@korea.ac.kr (K.J.)

<sup>2</sup> Department of Food Science and Nutrition, Jeju National University, Jeju 63243, Korea

<sup>3</sup> BK21FOUR R&E Center for Learning Health Systems, Korea University, Seoul 02841, Korea

\* Correspondence: kbhong@jejunu.ac.kr (K.-B.H.); suh1960@korea.ac.kr (H.J.S.); Tel.: +82-23-290-5639 (H.J.S.)

**Table S1.** Effects of milk phospholipids on body weight changes in ultraviolet (UV) B-irradiated hairless mice.

| Weeks | NOR                      | UVB-C      | ML         | MM         | MH         |
|-------|--------------------------|------------|------------|------------|------------|
| 1     | 31.63±0.48 <sup>ns</sup> | 31.43±0.50 | 31.75±0.82 | 31.90±0.31 | 31.08±0.56 |
| 2     | 31.83±0.78 <sup>ns</sup> | 31.48±0.11 | 32.48±0.77 | 31.98±0.75 | 31.73±0.57 |
| 3     | 32.93±0.49 <sup>ns</sup> | 32.03±0.42 | 33.28±0.91 | 32.68±0.85 | 32.83±0.91 |
| 4     | 33.63±0.36 <sup>ns</sup> | 33.10±0.58 | 33.55±1.10 | 33.30±0.79 | 32.63±0.82 |
| 5     | 34.43±0.51 <sup>ns</sup> | 33.75±0.48 | 34.33±0.98 | 34.85±0.75 | 33.63±0.86 |
| 6     | 35.60±0.45 <sup>ns</sup> | 34.58±0.73 | 34.50±0.91 | 34.90±0.60 | 34.35±0.86 |
| 7     | 36.05±0.77 <sup>ns</sup> | 35.83±0.63 | 35.88±0.67 | 35.70±0.71 | 34.95±0.93 |
| 8     | 36.13±0.62 <sup>ns</sup> | 34.75±0.57 | 35.78±1.22 | 36.28±0.66 | 34.55±0.42 |

NOR: oral administration of saline without UVB irradiation; UVB-C: oral administration of saline under UVB irradiation; ML: oral administration of low-dose (50 mg/kg b.w.) milk phospholipids under UVB irradiation; MM: oral administration of medium-dose (100 mg/kg b.w.) milk phospholipids under UVB irradiation; MH: oral administration of high-dose (150 mg/kg b.w.) milk phospholipids under UVB irradiation. Data are expressed as means  $\pm$  standard error (n=6). ns, not significant.

**Table S2.** Effects of milk phospholipids on serum biochemical parameters in ultraviolet (UV) B-irradiated hairless mice.

| Groups | GLU (mg/dL)                      | TG (mg/dL)                       | TCHO (mg/dL)                    | AST (U/L)                      | ALT (U/L)                      |
|--------|----------------------------------|----------------------------------|---------------------------------|--------------------------------|--------------------------------|
| NOR    | 429.00 $\pm$ 34.22 <sup>ns</sup> | 245.50 $\pm$ 11.87               | 136.75 $\pm$ 6.55 <sup>ns</sup> | 39.50 $\pm$ 3.50 <sup>ns</sup> | 57.75 $\pm$ 2.17 <sup>ns</sup> |
| UVB-C  | 442.00 $\pm$ 2.16                | 188.25 $\pm$ 18.15               | 143.00 $\pm$ 8.19               | 45.50 $\pm$ 1.71               | 59.25 $\pm$ 2.06               |
| ML     | 431.00 $\pm$ 23.19               | 200.50 $\pm$ 24.74               | 130.50 $\pm$ 4.43               | 45.50 $\pm$ 2.36               | 60.25 $\pm$ 2.78               |
| MM     | 494.00 $\pm$ 37.53               | 154.50 $\pm$ 18.04 <sup>#</sup>  | 129.00 $\pm$ 1.73               | 41.00 $\pm$ 1.29               | 57.75 $\pm$ 3.42               |
| MH     | 429.00 $\pm$ 41.19               | 132.60 $\pm$ 13.30 <sup>##</sup> | 126.50 $\pm$ 6.34               | 47.00 $\pm$ 5.00               | 64.50 $\pm$ 1.71               |

NOR: oral administration of saline without UVB irradiation; UVB-C: oral administration of saline under UVB irradiation; ML: oral administration of low-dose (50 mg/kg b.w.) milk phospholipids under UVB irradiation; MM: oral administration of medium-dose (100 mg/kg b.w.) milk phospholipids under UVB irradiation; MH: oral administration of high-dose (150 mg/kg b.w.) milk phospholipids under UVB irradiation. Data are expressed as means  $\pm$  standard error (n=6). #p<0.05 and ##p<0.01 vs. NOR group (Tukey's test). GLU, glucose; TG, triglyceride; TCHO, total cholesterol; AST, aspartate transaminase; ALT, alanine transferase; ns, not significant.
